# Supplementary figures and images for: Synthesis of an optically active C3-symmetric cage-like trisamide
Source: Royal Society of Chemistry journal article supplement (doi:10.1039/b101193f), 2001-01-01

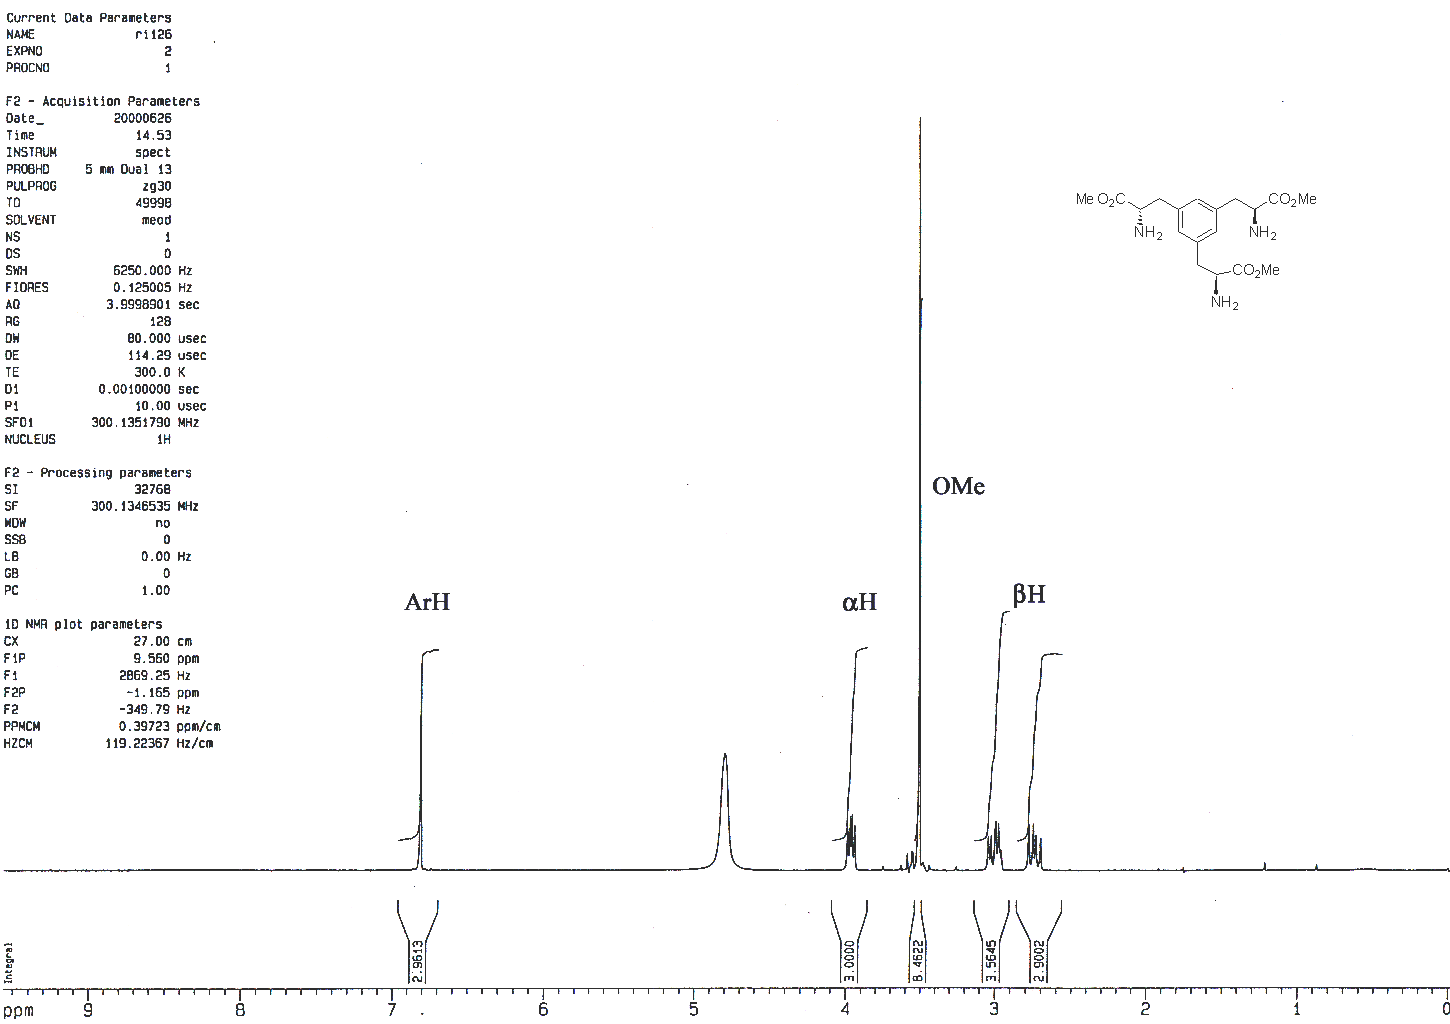


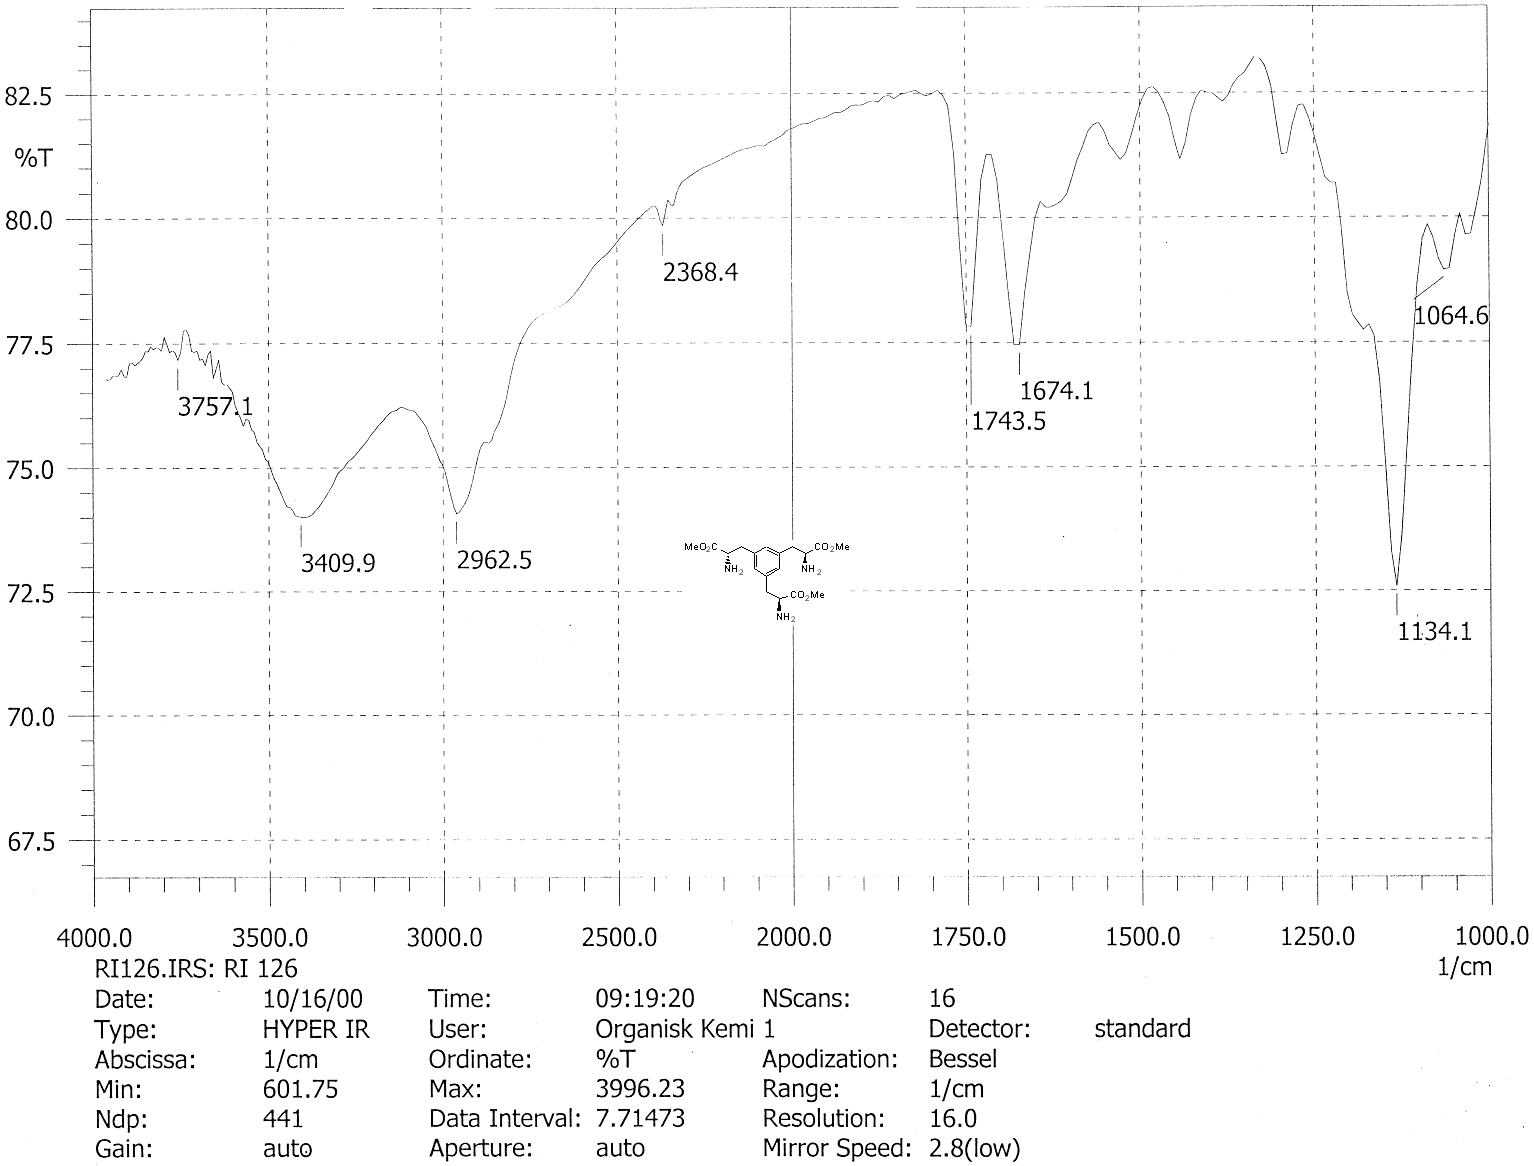


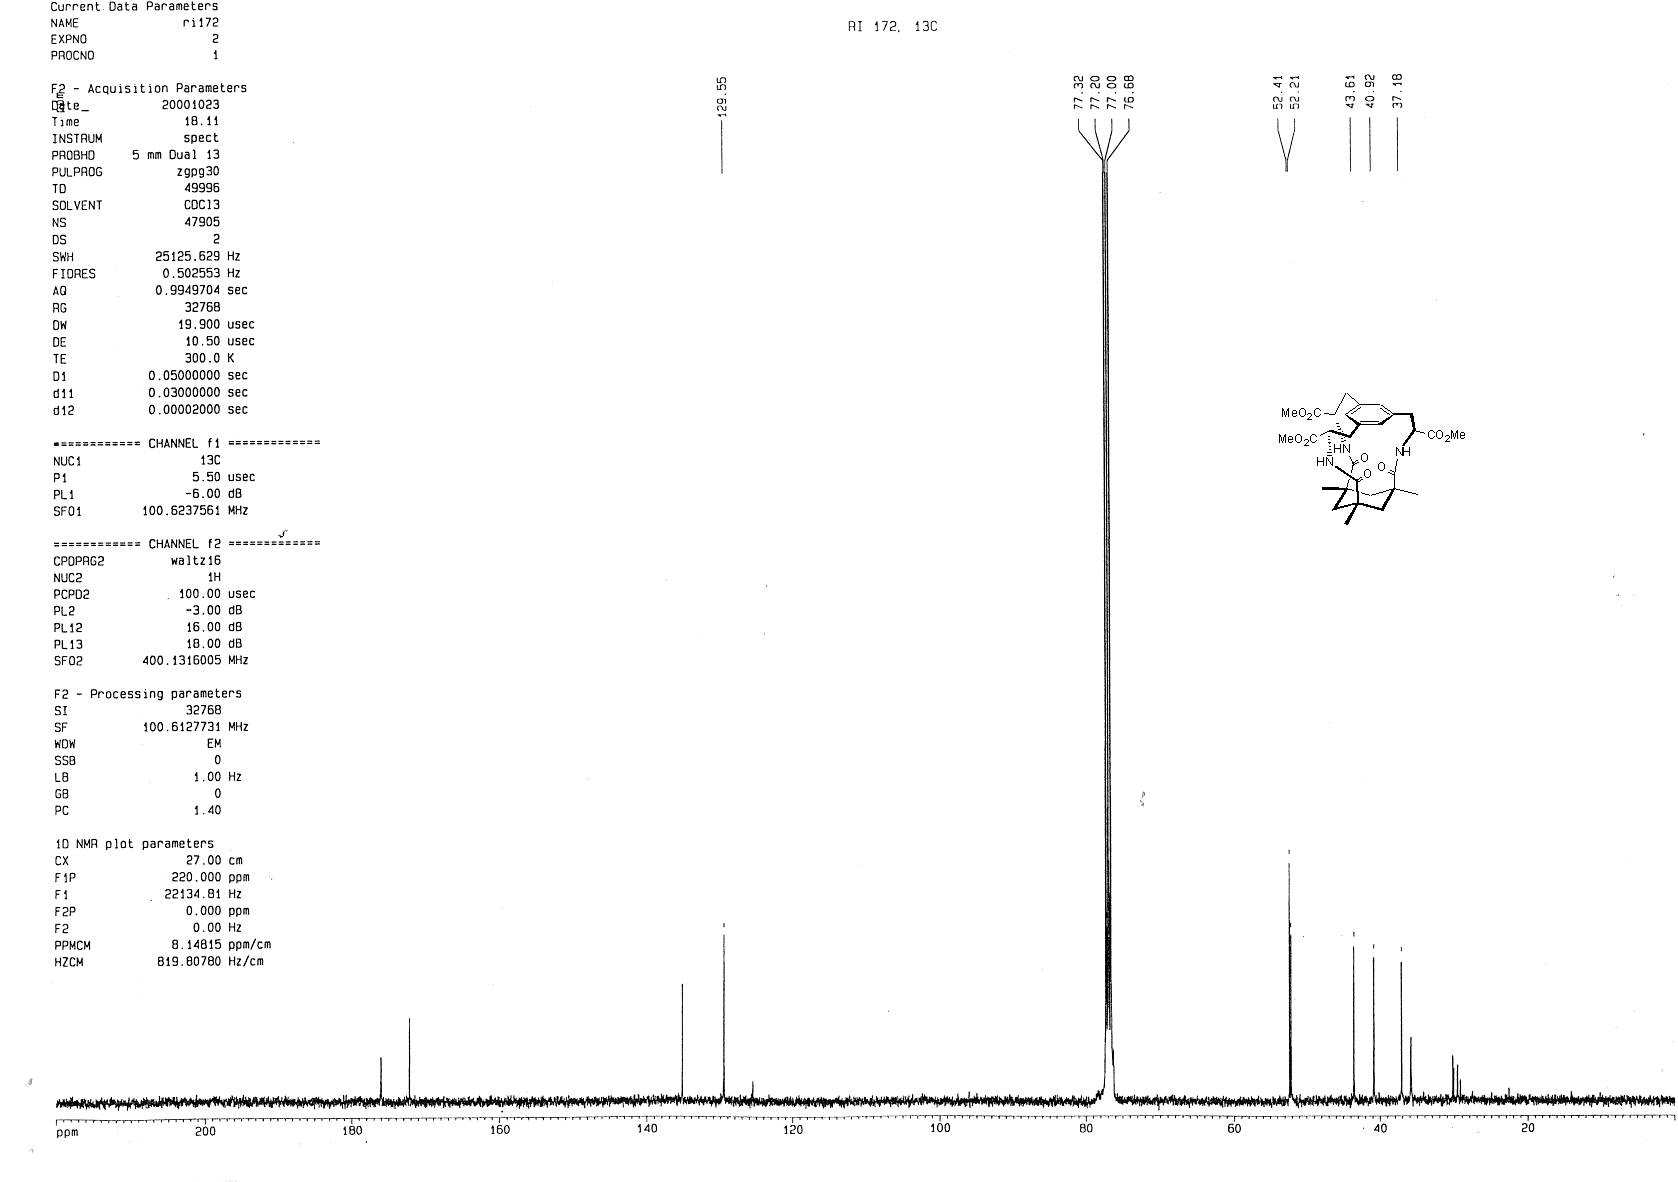


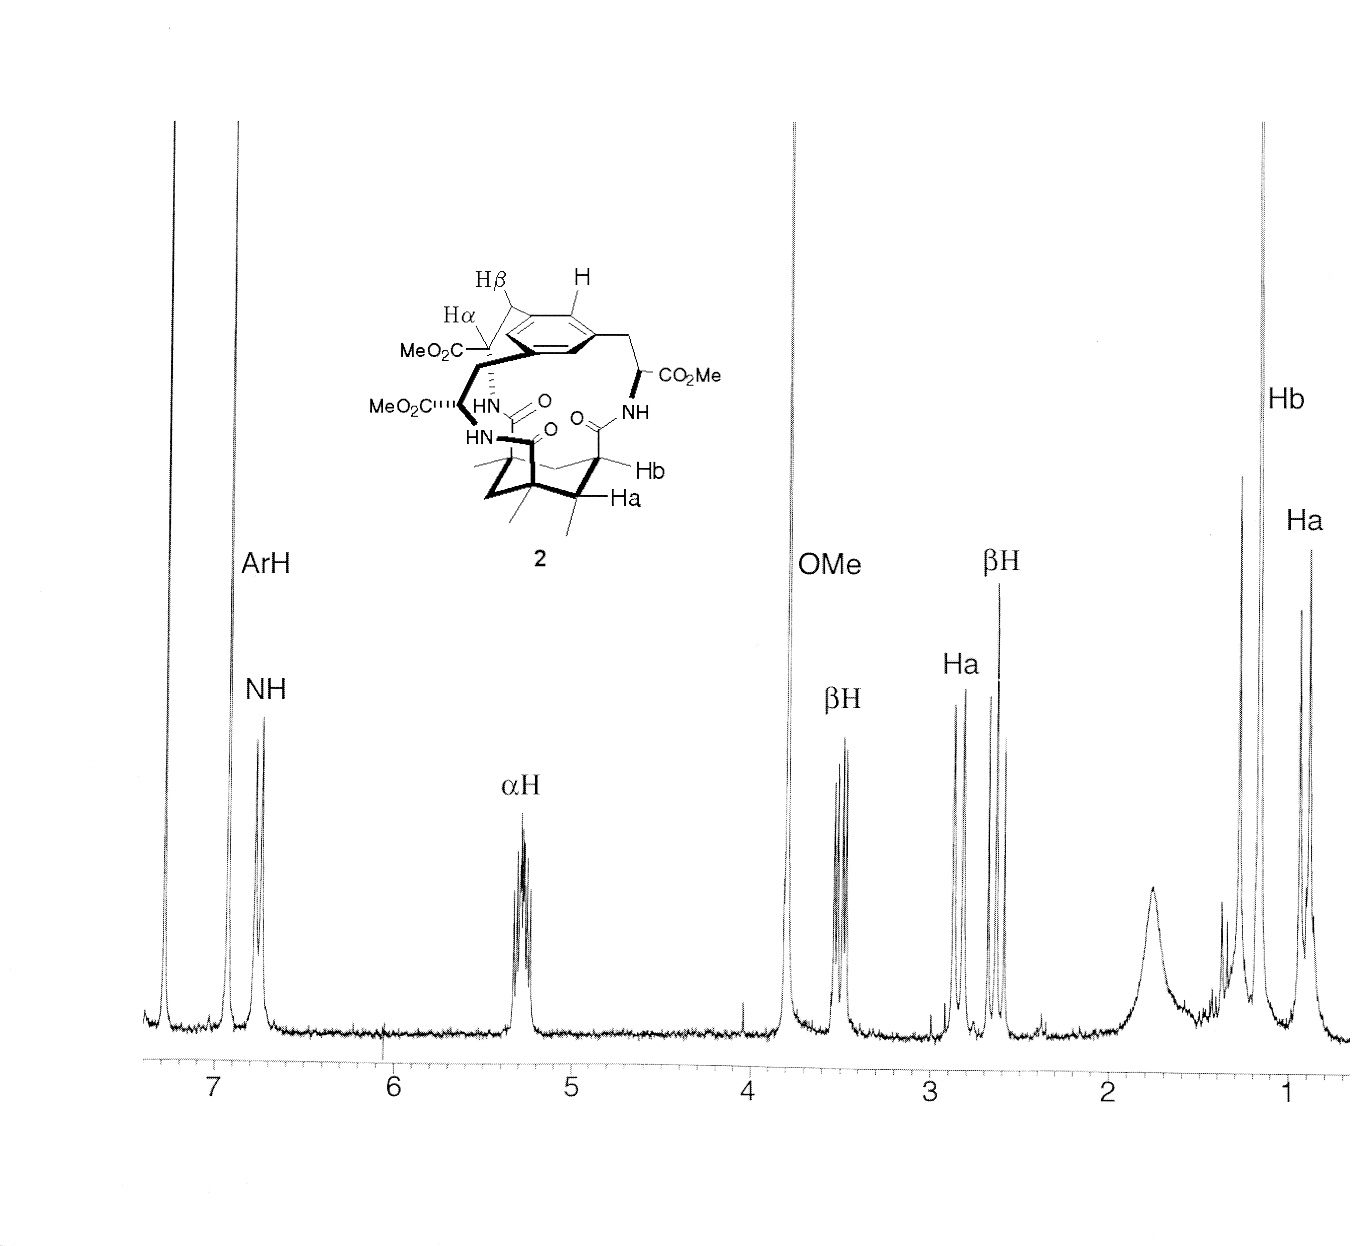


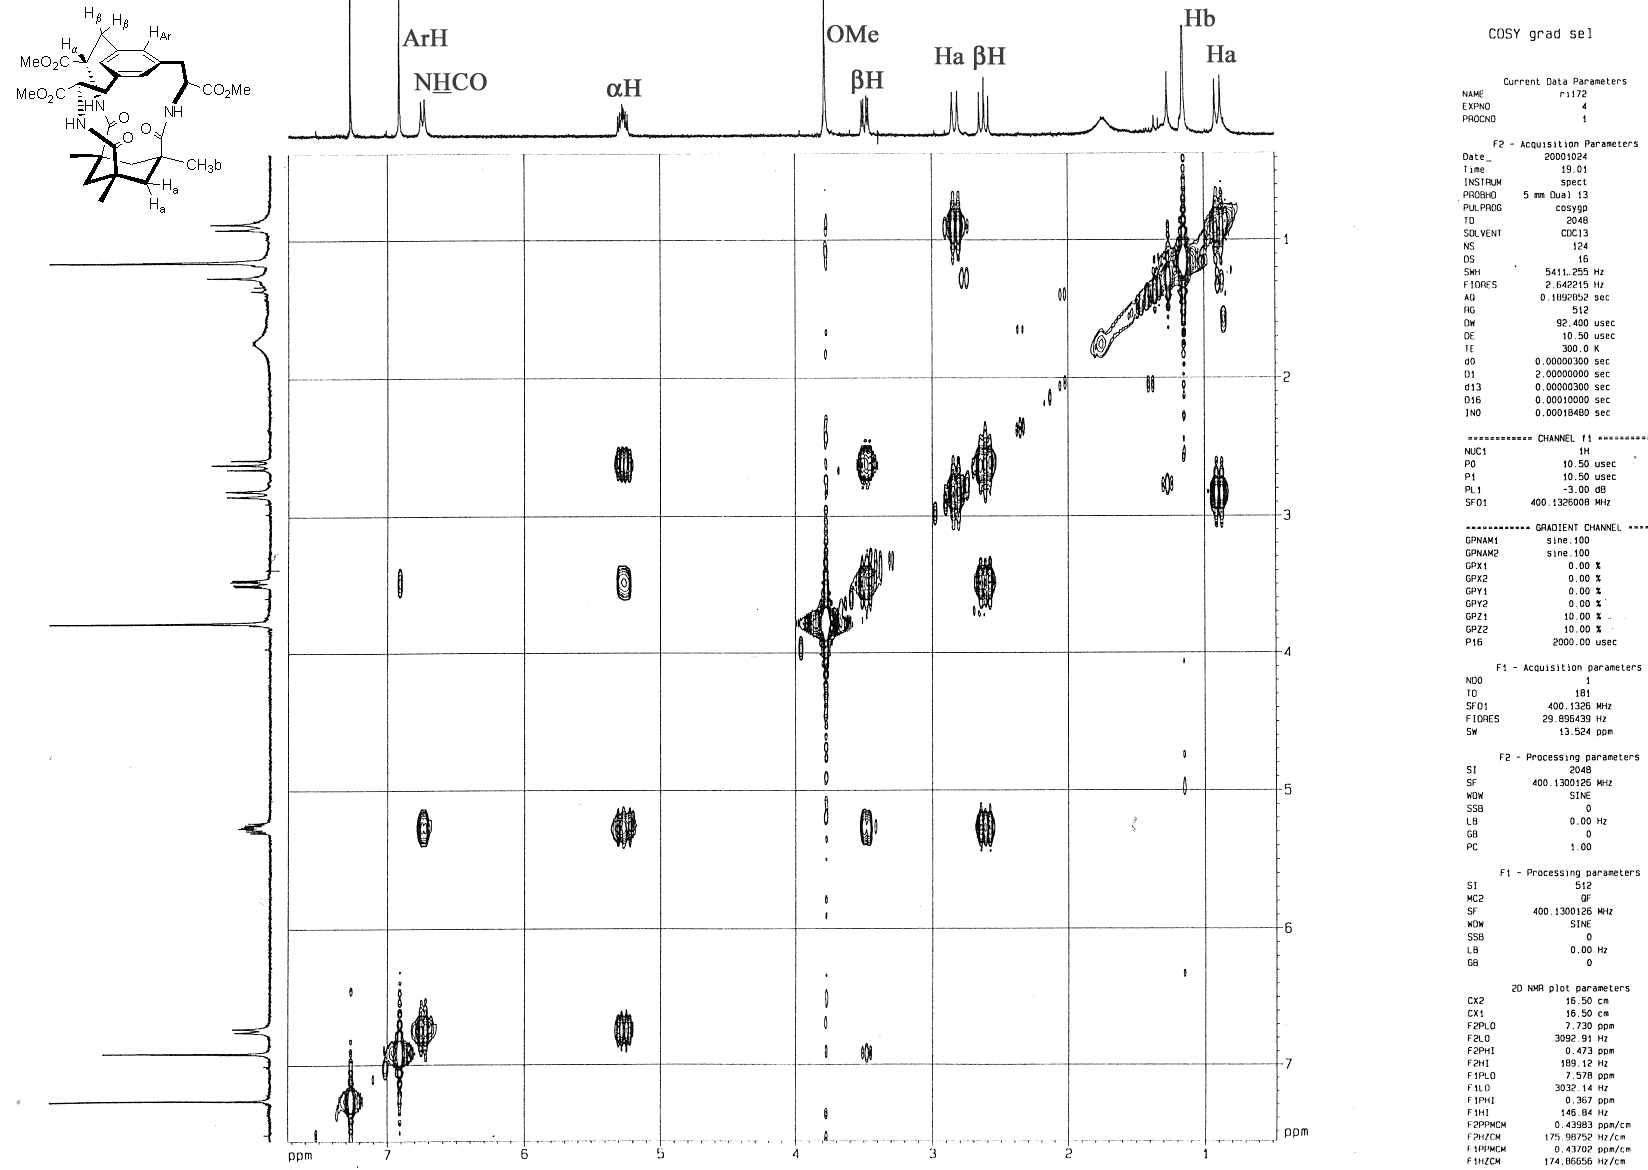


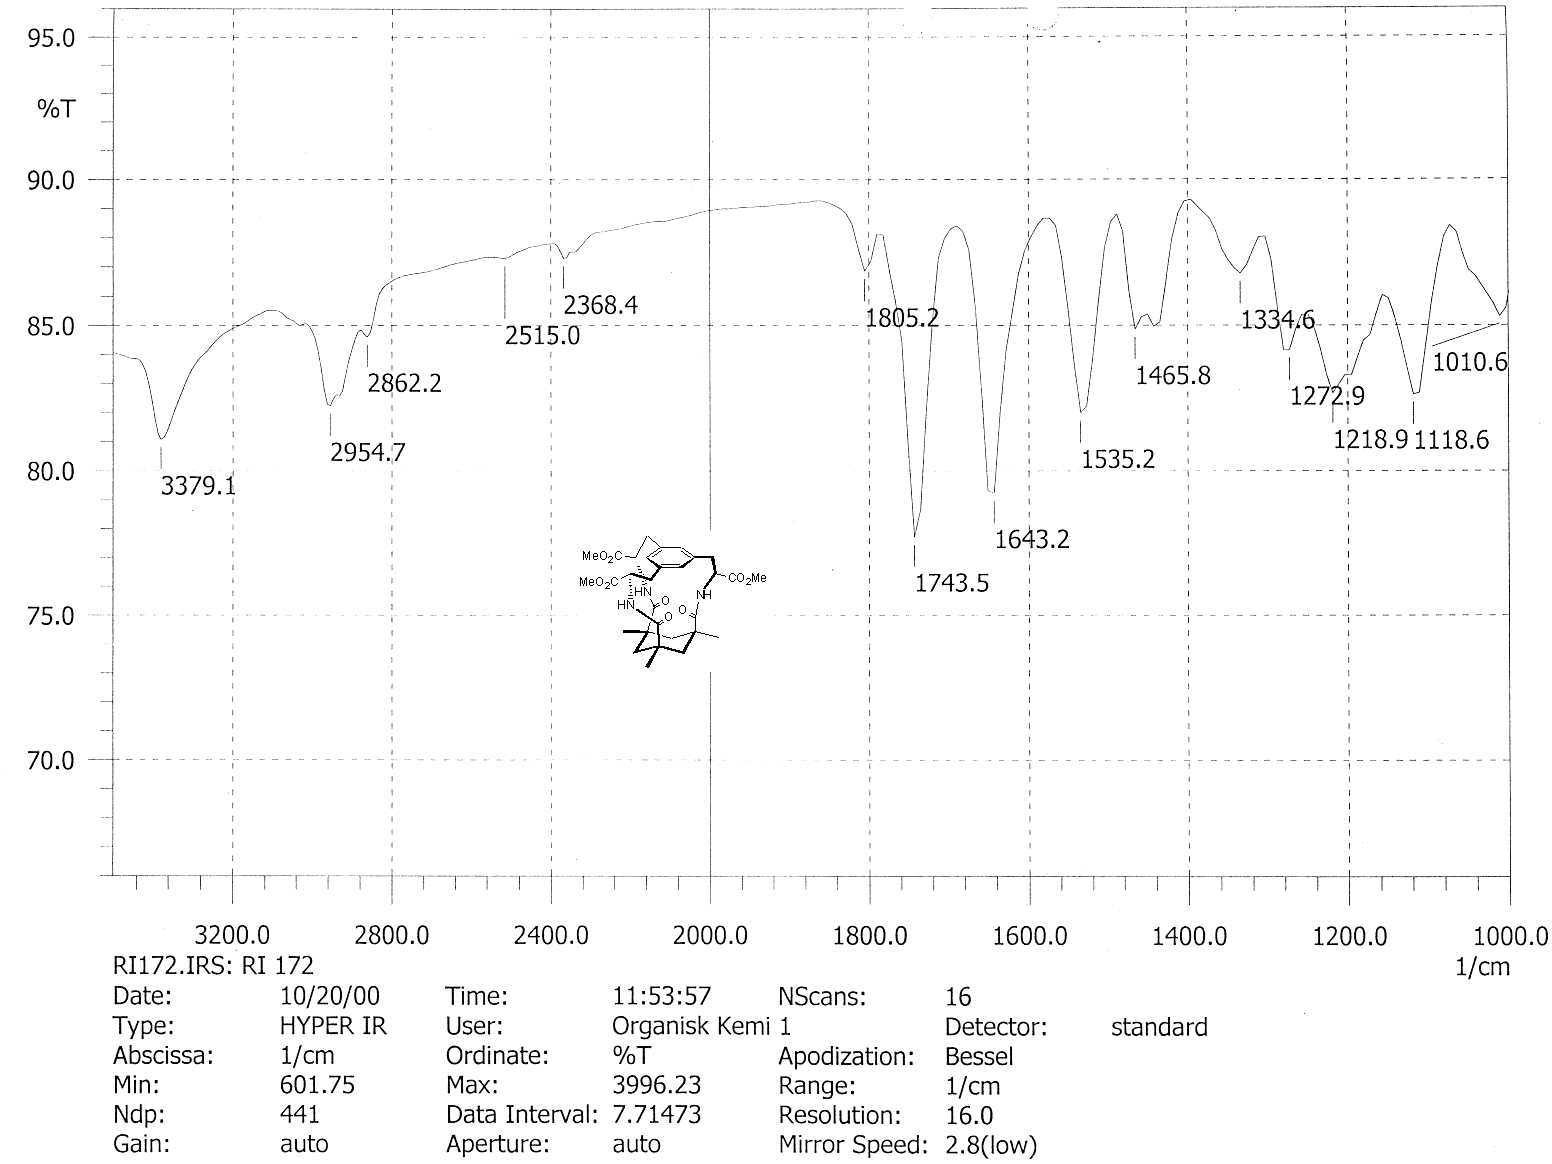

Supplement: b101193f.doc [file b101193f.doc]
